# Supplementary material for: A high throughput multi-locus insecticide resistance marker panel for tracking resistance emergence and spread in Anopheles gambiae
Source: PubMed Central journal article supplement (PMC6746726; doi:10.1038/s41598-019-49892-6), 2019-09-16
Supplement: 41598_2019_49892_MOESM1_ESM.pdf [file 41598_2019_49892_MOESM1_ESM.pdf]

**A high throughput multi-locus insecticide resistance  
marker panel for tracking resistance emergence and  
spread in *Anopheles gambiae***

Eric R. Lucas, Kirk A. Rockett, Amy Lynd, John Essandoh, Nelson Grisales, Brigid Kemei, Harun Njoroge, Christina Hubbart, Emily J. Rippon, John Morgan, Arjen Van't Hof, Eric O. Ochomo, Dominic P. Kwiatkowski, David Weetman, Martin J. Donnelly

**Electronic Supplementary Material**  
**Supplementary figures and tables**

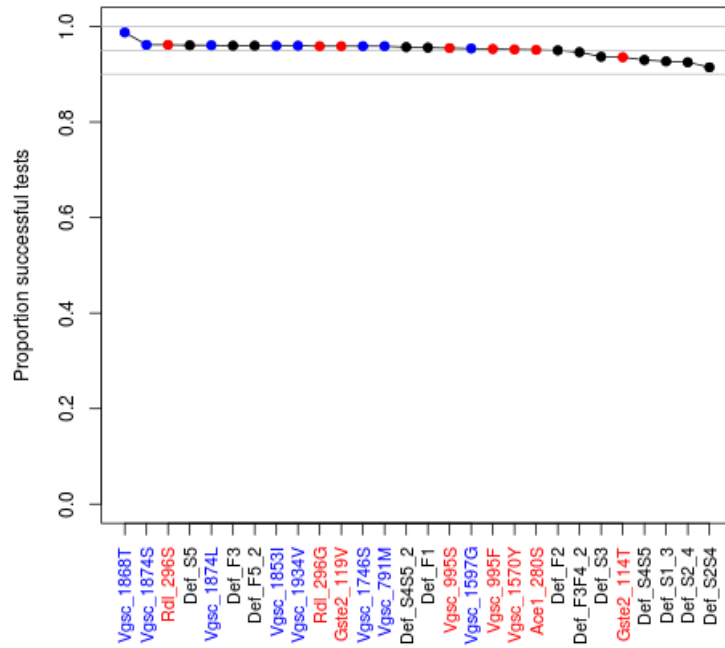

**Fig. S1:** Success rate of individual SNP assays in the multiplex sequenome assay was never lower than 90% (measured as the proportion of assays that were of high enough quality to give a genotype call). Red points indicate known resistance variants, blue points indicate variants found on the background of some *kdr* mutations and which may therefore be associated with either increased resistance or compensation for the costs of the *kdr* mutations, black points indicate SNPs used to distinguish between *kdr* mutant haplotype backgrounds.

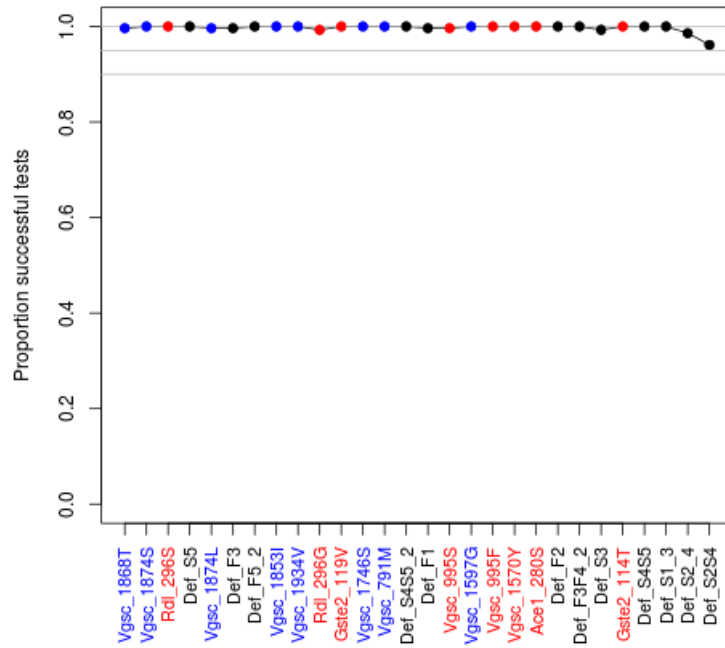

**Fig. S2:** Success rate of individual SNP assays among *An. coluzzii* samples was never lower than 95% (measured as the proportion of assays that were of high enough quality to give a genotype call). Red points indicate known resistance variants, blue points indicate variants found on the background of some *kdr* mutations, black points indicate SNPs used to distinguish between *kdr* mutant haplotype backgrounds.

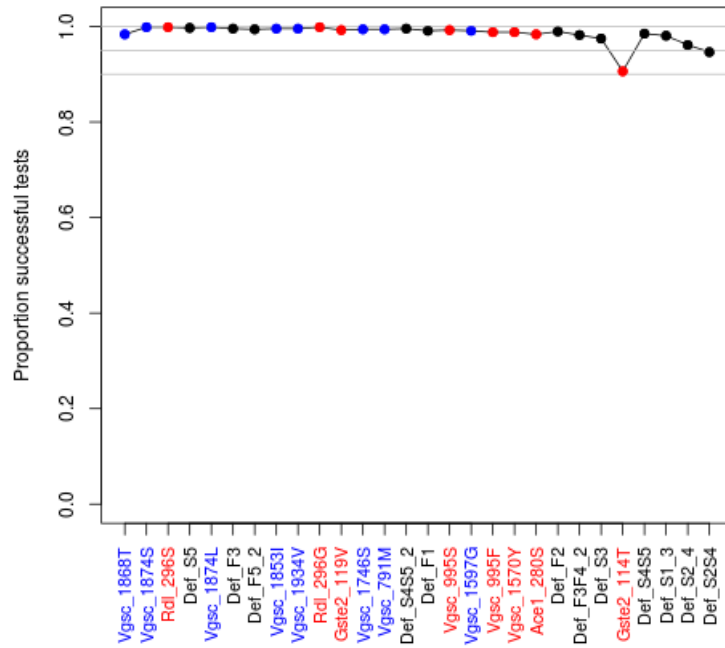

**Fig. S3:** Success rate of individual SNP assays among *An. gambiae* samples was never lower than 90% (measured as the proportion of assays that were of high enough quality to give a genotype call). Red points indicate known resistance variants, blue points indicate variants found on the background of some *ldr* mutations, black points indicate SNPs used to distinguish between *ldr* mutant haplotype backgrounds.

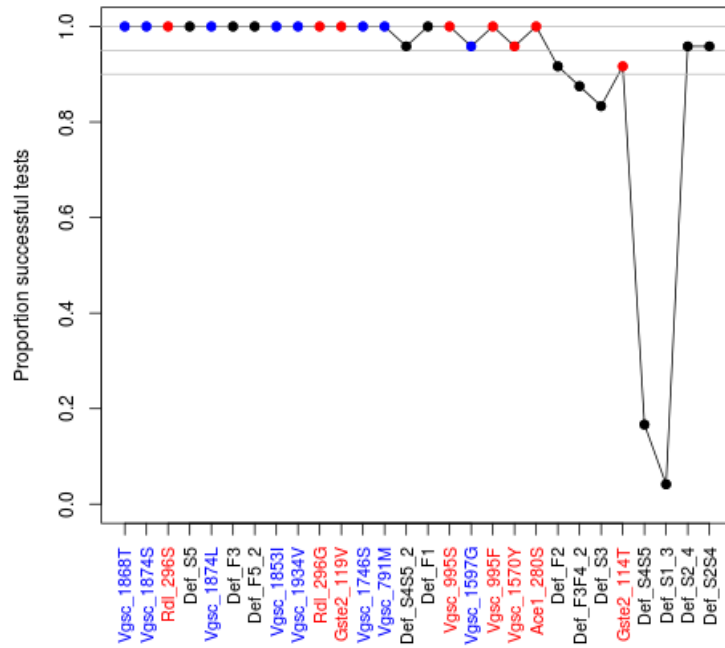

**Fig. S4:** Success rate of individual SNP assays among *An. arabiensis* samples was good overall, but some assays had a low rate of success (measured as the proportion of assays that were of high enough quality to give a genotype call). All four assays with success rates below 90% were ones used to distinguish between *kdr* haplotype backgrounds. Red points indicate known resistance variants, blue points indicate variants found on the background of some *kdr* mutations, black points indicate SNPs used to distinguish between *kdr* mutant haplotype backgrounds.

Table **S1**: Bioassay results for samples from Burkina Faso (CDC bottle assay).

| Location   | 20ppm Permethrin |      |       | Mortality |
|------------|------------------|------|-------|-----------|
|            | Dead             | Live | Total |           |
| Bakaridjan | 30               | 11   | 41    | 73.2%     |
| Bounouba   | 15               | 26   | 41    | 36.6%     |
| Naniagara  | 15               | 33   | 48    | 31.3%     |
| Tiefora    | 24               | 52   | 76    | 31.6%     |

Table **S2**: Bioassay results for samples from DRC (WHO tube assay).

| Location | 0.75% Permethrin |      |       | Mortality |
|----------|------------------|------|-------|-----------|
|          | Dead             | Live | Total |           |
| Pwamba   | 7                | 18   | 25    | 28.0%     |
| Fiwa     | 98               | 83   | 181   | 54.1%     |
| Bassa    | 101              | 45   | 146   | 69.2%     |

| Location | 0.05% Deltamethrin |      |       | Mortality |
|----------|--------------------|------|-------|-----------|
|          | Dead               | Live | Total |           |
| Pwamba   | 40                 | 23   | 63    | 63.5%     |
| Fiwa     | 131                | 44   | 175   | 74.9%     |
| Bassa    | 119                | 24   | 143   | 83.2%     |

Table **S3**: Bioassay results for samples from Ghana (WHO tube assay).

| Location | 0.75% Permethrin |      |       | Mortality |
|----------|------------------|------|-------|-----------|
|          | Dead             | Live | Total |           |
| Keta     | 61               | 50   | 111   | 55.0%     |

| Location | 0.05% Deltamethrin |      |       | Mortality |
|----------|--------------------|------|-------|-----------|
|          | Dead               | Live | Total |           |
| Keta     | 75                 | 45   | 121   | 62.0%     |

| Location | 4% DDT |      |       | Mortality |
|----------|--------|------|-------|-----------|
|          | Dead   | Live | Total |           |
| Keta     | 43     | 66   | 110   | 39.1%     |

Table **S4**: Bioassay results for samples from Kenya WHO tube assay. Results are for *An. gambiae* s.l. in 2015.

| Location  | 0.75% Permethrin |      |       | Mortality |
|-----------|------------------|------|-------|-----------|
|           | Dead             | Live | Total |           |
| Bondo     | 522              | 569  | 1091  | 47.8%     |
| Nyando    | 319              | 198  | 517   | 61.7%     |
| Rachuonyo | 670              | 218  | 888   | 75.5%     |
| Teso      | 332              | 409  | 741   | 44.8%     |

| Location  | 0.05% Deltamethrin |      |       | Mortality |
|-----------|--------------------|------|-------|-----------|
|           | Dead               | Live | Total |           |
| Bondo     | 1028               | 759  | 1787  | 57.6%     |
| Nyando    | 537                | 342  | 879   | 61.1%     |
| Rachuonyo | 919                | 213  | 1132  | 81.2%     |
| Teso      | 585                | 750  | 1335  | 43.8%     |

Table **S5**: SNPs VGC-1746S and VGC-791M are almost perfectly associated (only two samples give discordant calls). The wild-type alleles are G and C for 1746S and 791M respectively.

|          |    | VGC-1746S |    |    |
|----------|----|-----------|----|----|
|          |    | GG        | GT | TT |
| VGC-791M | CC | 672       | 0  | 0  |
|          | CT | 2         | 33 | 0  |
|          | TT | 0         | 0  | 5  |
